# Supplementary material for: Chatbot Construction for Business-Oriented Use Cases
Source: Research Square preprint supplement (doi:10.21203/rs.3.rs-4278245/v1), 2024-04-22
Supplement: Supplementary file 1 [file Query-Durations.xlsx]

## Sheet: Queries - Durations
	Tokens	First Token	Completion				Tokens	First Token	Completion
"What is your purpose?"	923	208	3950			"Calculate expression ((2.152 - 1.153) + 61.5542)^12.15"	1985	452	6240
	923	208	3400				1971	451	5810
	923	227	2960				1971	504	6260
	923	451	3080				1971	213	6090
	923	484	3390				1971	441	5310
	923	456	2680				1971	203	5300
	923	210	3170				1971	199	5540
	923	459	3660				1971	449	5720
	923	496	2760				1971	201	6100
	923	487	3330				1971	431	4960
	923	368.6	3238				1972.4	354.4	5733
	Tokens	First Token	Completion				Tokens	First Token	Completion
"Is it possible to get a refund for product broken by my fault?"	2986	228	14830			"What is the most expensive laptop in stock?"	2456	445	27250
	2847	450	17450				2076	193	10710
	3086	195	12840				2073	531	11700
	2964	212	13230				2080	503	12560
	3081	202	15220				2445	221	27920
	2968	498	12320				2073	205	12780
	2983	201	14960				2455	206	27340
	2962	195	13680				2080	193	11680
	3112	190	13270				2565	187	24690
	3038	192	13630				2455	222	23380
	3002.7	256.3	14143				2275.8	290.6	19001
