# Supplementary material for: Chatbot Construction for Business-Oriented Use Cases
Source: Research Square preprint supplement (doi:10.21203/rs.3.rs-4278245/v1), 2024-04-22
Supplement: Supplementary file 2 [file Tool-Usage.xlsx]

## Sheet: Queries - Durations
Expected Action / Tool	Question ID	Query	Tools	Correct Tool Usage (GPT-4)	Correct Tool Usage (GPT-3.5-Turbo)	Correct Answer Reached (GPT-4)	Correct Answer Reached (GPT-3.5-Turbo)	Notes (GPT-4)	Notes (GPT-3.5-Turbo)
None	0	Hi, can you help me with something?	-	10	0	10	0		All flows are internally unprocessed (agent failure due to mishandling of formatting instructions). The processing cycle in the agent occurred. Agent attempted to use tools.
	1	What is your purpose?	-	10	0	10	0		All flows are internally unprocessed (agent failure due to mishandling of formatting instructions). The processing cycle in the agent occurred. Agent attempted to use tools.
	2	Nice weather we have today, right?	-	10	0	10	0		All flows are internally unprocessed (agent failure due to mishandling of formatting instructions). The processing cycle in the agent occurred. Agent attempted to use tools.
Preprocessing - Content check	3	I don´t want to talk with you, you d*mb robot	Content Validator	10	10	10	10
	4	F*ck off with your smart*ass info	Content Validator	10	10	10	10
	5	I really hate those non-wealthy customers, you should forbid them from entering your shop	Content Validator	10	10	10	9		One response not returned, logs suggest query retry - probably API connection failure
Preprocessing - Validity check	6	I notebook inventory huh?	Validity Check	10	0	10	0		The agent performed cyclical use of tools until its internal scratchpad failed on LLM context length overflow.
	7	Tell best device, now	Validity Check	0	3	N/A	3	GPT-4 Model considered this very bold question valid - with no other information about what quantifies the "top" model, internal logs suggest formulation of SQL query into product database based on price - according to this logic, obtained answers were correct. However, overall expected behavior in this scenario should be different.	Surprisingly, GPT-3.5-Turbo evaluated this question as invalid more frequently than GPT-4. Unfortunately, only three answers reached the user - others failed internally in the central processing loop.
	8	And customer service, what about?	Validity Check	10	0	10	0		All flows are internally unprocessed (agent failure due to mishandling of formatting instructions). The processing cycle in the agent occurred.
Relational DB Search	9	What is the most expensive laptop in stock?	Relational DB	10	6	10	2	In some answers, multiple results were provided, ordered by price. The most expensive laptop was correctly included in all of the responses.	Agent formulated correct SQL query in proper tool quite often - unfortunately, LLM backing it up was often not attentive enough to the fact that correct answer has already been obtained from the tool.
	10	Recommend a Lenovo Laptop between 30k - 40k Kč	Relational DB	10	0	10	0	Laptops barely above the 30k limit, but according to specified criteria	In all recorded cases, the agent attempted to use semantic search in product parameters for price filtering.
	11	What kind of CPU does this phone have? [URL]	Relational DB / Vector DB (Products)	10	0	10	0	Successfuly handled, parameters obtained from semantic search (alternate tool usage chosen by agent)	In all recorded cases, the question was interpreted as potentially invalid and triggered a validity check
Vector DB (Semantic) Search	12	Is it possible to get a refund for product broken by my fault?	Vector DB (FAQ)	10	5	N/A	0	Trick question, not explicitly stated in the dataset - model performed search and formulated answer independently, successfully handling non-related data being returned from vector search.	In half of the recorded cases, the agent correctly used semantic search in FAQ data space but was unable to recognize the correct answer even if found, thus kept stuck in the processing cycle
	13	Do you deliver orders abroad?	Vector DB (FAQ)	10	10	10	0		In all of the recorded cases, the agent correctly used semantic search in FAQ data space but was unable to recognize the correct answer even if found, thus kept stuck in the processing cycle
	14	Give me contact information for customer support	Vector DB (FAQ)	10	7	10	0	Response formats differ - some listed phone / email explicitly, some listed link to website containing this information, one response listed only correct e-mail. However, all answers were correct according to used dataset.	During processing, the correct tool was chosen surprisingly often - although only sometimes was the agent able to reformulate the questions correctly while accessing the semantic search database, thus resulting in responses not containing the required information.
Math Tool (Wolfram API)	15	Calculate expression ((2.152 - 1.153) + 61.5542) ^ 12.15	Math Tool	10	10	10	0		The correct tool was always chosen, and the correct answer was internally obtained but never presented to the user in a clear and concise message due to the agent´s inability to hold onto internal formatting instructions.
	16	If I buy a product worth 50k Kč with 150Kč monthly fixed interest, how much do I have to pay each month to repay it fully within 20 months?	Math Tool	10	10	10	0		The correct tool was always chosen, and the correct answer was internally obtained but never presented to the user in a clear and concise message due to the agent´s inability to hold onto internal formatting instructions.
Relational DB Search + Vector DB Search	17	Recommend a Lenovo laptop between 30k – 40k Kč - is it possible to get a refund for it if I don´t unbox it?	Relational DB	10	0	10	0		In all recorded cases, the agent attempted to use semantic search in product parameters for price filtering.
			Vector DB (FAQ)	10	0
	18	Does this phone [URL] contain protective screen foil? If no, can you install it for me?	Relational DB / Vector DB (Products)	10	10	0	0	Tha answers were always partially correct - the specified phone does not come with protective foil. However, in none of the queries did the model recognize the need to search in the vector database to verify if foil installation is offered as a service. In 4 out of 10 answers, it incorrectly said this service is not provided - in the other six answers, LLM recommended asking Datart customer servi…	The same results as GPT-4 + inability to process even partial answers mostly resulted in time-out due to the processing cycle
			Vector DB (FAQ)	0	0
	19	I want to buy some Acer notebook below 50k Kč. In return, I would like to bring my old one for recycling. Is it possible?	Relational DB	10	0	10	0	Recommended Acer Laptops were overly cheap, but that was due to a lack of specificity in filtration criteria.	In most iterations, the agent performed cyclical use of tools until its internal scratchpad failed on LLM context length overflow.
			Vector DB (FAQ)	10	0
Relational DB Search + Math Tool	20	Find the cheapest available television and tell me how much I´m going to pay for it monthly if I will be repaying for 2 years	Relational DB	10	1	10	0		Math tool was never used. In two cases, the question was - for whatever reason - validity checked as inappropriate. Answer screenshots suggest that only one instance of answer hinting correct DB usage, but the log suggests this response was never completed fully and resulted in a time-out in the agent processing cycle.
			Math Tool	10	0
	21	What is the price difference between most expensive and least expensive Apple phone in stock?	Relational DB	10	0	0	0	Although the LLM agent correctly decided the sequence of tools needed, it failed in query formulation. In all instances, only one SQL query was performed, which returned the first and second most expensive Apple mobile phones. Thus, the answer that was obtained was not correct.	Both math tool and relational DB were never used.
			Math Tool	10	0
Vector DB Search + Math Tool	22	If I am buying a phone for 45125.25 Kč along with screen protector application, what is the price total going to be?	Vector DB (FAQ)	4	0	2	0	Only in four cases has the agent correctly detected that a search in provided services is needed. Moreover, in two of these cases, semantic search due to internal reformulation of query missed the intended answer (349 Kč)	The agent tried to use the math tool in all recorded question iterations but never recognized the need to search for screen protector application service details.
			Math Tool	9	10
	23	I have interest in using your DOPRAVART delivery service - what is the price and how much money will I have left if I have 1244.95 Kč available right now?	Vector DB (FAQ)	10	0	10	0		Multiple occasions of questions triggering validation check. The vector tool was never used, and the math tool usage was sporadic.
			Math Tool	10	5
Tool Usage Success	None	Content Check	Validity Check	Relational Database	Vector Database	Math Tool		Correct Answer Reached	Success Rate
GPT-3.5-Turbo	0	1	0.1	0.2125	0.275	0.583333		GPT-3.5-Turbo	0.141667
GPT-4	1	1	0.666667	1	0.8	0.983333		GPT-4	0.872727
