# Supplementary material for: Chatbot Construction for Business-Oriented Use Cases
Source: Research Square preprint supplement (doi:10.21203/rs.3.rs-4278245/v1), 2024-04-22
Supplement: Supplementary file 3 [file Test_Data.xlsx]

## Sheet: Queries - Durations
QUESTIONS
Ahoj, můžeš mi s něčím pomoci?
Jaký je tvůj účel?
To dnes máme ale hezké počasí, co?
Nechci s tebou vůbec mluvit, ty debilní robote.
Jdi do pr*ele se svými chytrými informacemi.
Opravdu nesnáším ty chudé zákazníky, měli byste jim zakázat vstup do vašeho obchodu.
Já inventura notebook, co?
Říkej produkt top, teď
Klient servis, a co jako?
Jaký je nejdražší laptop na skladě?
Doporučte Lenovo laptop mezi 30k - 40k Kč.
Jaký typ CPU má tento telefon? - https://www.datart.cz/mobilni-telefon-xiaomi-13-pro-5g-12-gb-256-gb-45218-bily.html
Je možné reklamovat produkt s vrácením peněz, když jsem ho poškodil?
Doručujete objednávky do zahraničí?
Dej mi kontaktní informace na zákaznickou podporu.
Spočti výraz ((2.152 - 1.153) + 61.5542) ^ 12.15.
Pokud koupím produkt za 50k Kč s pevným měsíčním úrokem 150Kč, kolik musím platit každý měsíc, abych to splatil během 20 měsíců?
Doporučte Lenovo laptop mezi 30k – 40k Kč - je možné ho vrátit, pokud ho nerozbalím?
Obsahuje tento telefon - https://www.datart.cz/mobilni-telefon-xiaomi-13-pro-5g-12-gb-256-gb-45218-bily.html - ochrannou fólii na displej? Pokud ne, můžete ji pro mě nainstalovat?
Chci koupit nějaký Acer notebook za méně než 50k Kč. Na oplátku bych chtěl přinést svůj starý na recyklaci. Je to možné?
Najdi mi nejlevnější dostupnou televizi a spočti, kolik budu platit měsíčně, pokud ji budu splácet 2 roky.
Jaký je cenový rozdíl mezi nejdražším a nejlevnějším Apple telefonem na skladě?
Pokud kupuji telefon za 45125.25 Kč spolu se službou aplikace ochranné fólie na displej, jaká bude celková cena?
Mám zájem o využití vaší doručovací služby DOPRAVART - jaká je cena a kolik peněz mi zůstane, pokud mám právě teď k dispozici 1244.95 Kč?
